# Supplementary material for: Involvement of Large-Conductance Ca2+-Activated K+ Channels in Chloroquine-Induced Force Alterations in Pre-Contracted Airway Smooth Muscle
Source: PubMed Central journal article supplement (PMC4378962; doi:10.1371/journal.pone.0121566), 2015-03-30
Supplement: pone.0121566.s001.pdf [file pone.0121566.s001.pdf]

**Figure S1**

**A**

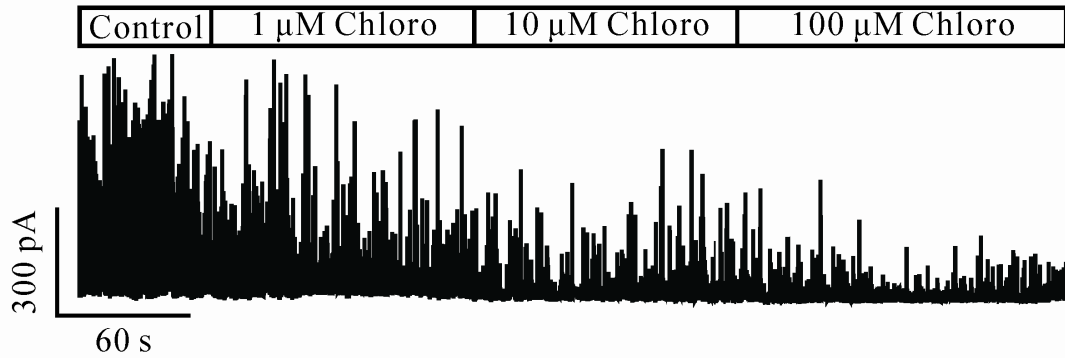

**B**

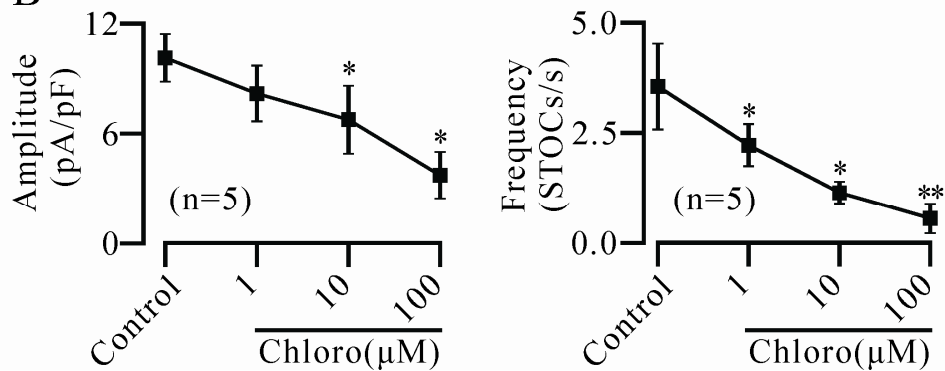

**Figure S1. Chlora inhibits STOCs. (A)** STOCs were recorded at 10 mV, which were gradually inhibited by chlora. **(B)** The dose-dependent inhibition of amplitude and frequency from 5 cells. \* denotes  $p < 0.05$  (versus control); \*\* denotes  $p < 0.01$  (versus control). These data show that chlora dose-dependently inhibits STOCs.
