# Supplementary material for: Involvement of Large-Conductance Ca2+-Activated K+ Channels in Chloroquine-Induced Force Alterations in Pre-Contracted Airway Smooth Muscle
Source: PubMed Central journal article supplement (PMC4378962; doi:10.1371/journal.pone.0121566), 2015-03-30
Supplement: pone.0121566.s002.pdf [file pone.0121566.s002.pdf]

**Figure S2**

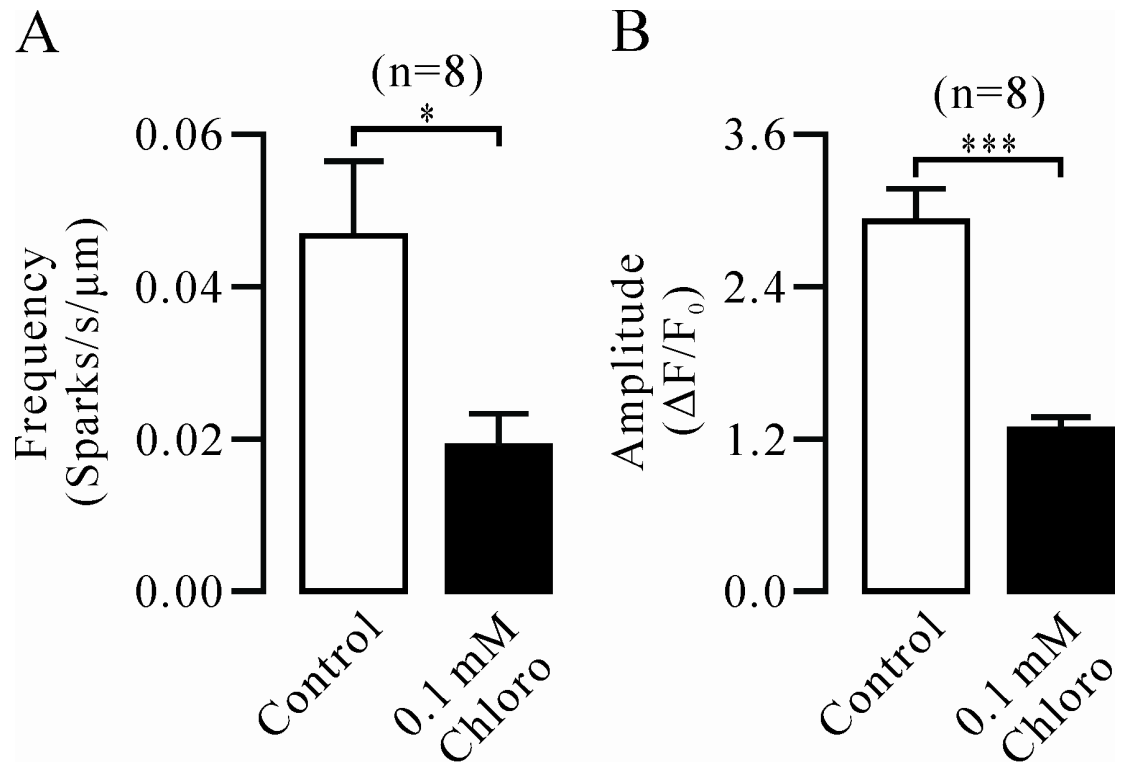

**Figure S2. Chloro inhibits Ca<sup>2+</sup> sparks.** Ca<sup>2+</sup> sparks from 8 cells were measured as described in Figure 2A. **(A)** The frequency and **(B)** amplitude were markedly inhibited by 0.1 mM chloro. \* denotes  $p < 0.05$ ; \*\*\* denotes  $p < 0.001$ . These experiments demonstrate that low concentrations of chloro do not completely block, but rather inhibit RyRs.
