# Supplementary material for: Involvement of Large-Conductance Ca2+-Activated K+ Channels in Chloroquine-Induced Force Alterations in Pre-Contracted Airway Smooth Muscle
Source: PubMed Central journal article supplement (PMC4378962; doi:10.1371/journal.pone.0121566), 2015-03-30
Supplement: pone.0121566.s003.pdf [file pone.0121566.s003.pdf]

Figure S3.

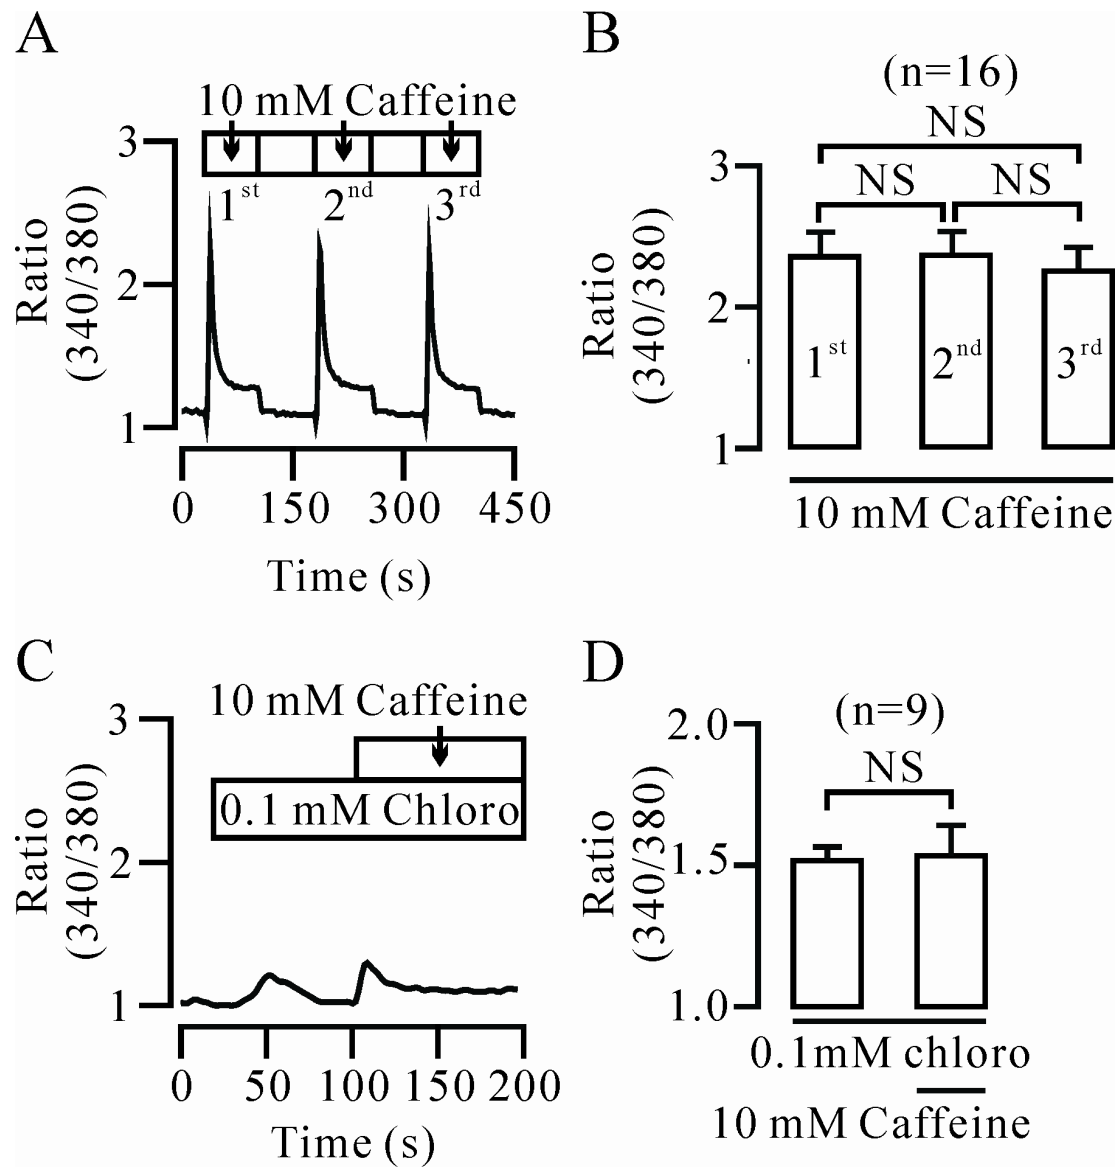

**Figure S3. Effect of chloro and caffeine on intracellular  $\text{Ca}^{2+}$  levels.** (A, B) Caffeine (10 mM) repetitively triggered a similar transient  $\text{Ca}^{2+}$  increase. (C, D) Chloro (0.1 mM) induced a transient  $\text{Ca}^{2+}$  rise. Following the addition of the same concentration of caffeine, a small  $\text{Ca}^{2+}$  elevation was observed. These experiments demonstrate that chloro can induce  $\text{Ca}^{2+}$  increases and inhibit the following caffeine-triggered  $\text{Ca}^{2+}$  elevations. NS:  $p > 0.05$ .
