# Supplementary material for: Involvement of Large-Conductance Ca2+-Activated K+ Channels in Chloroquine-Induced Force Alterations in Pre-Contracted Airway Smooth Muscle
Source: PubMed Central journal article supplement (PMC4378962; doi:10.1371/journal.pone.0121566), 2015-03-30
Supplement: pone.0121566.s005.pdf [file pone.0121566.s005.pdf]

**Figure S5**

**A**

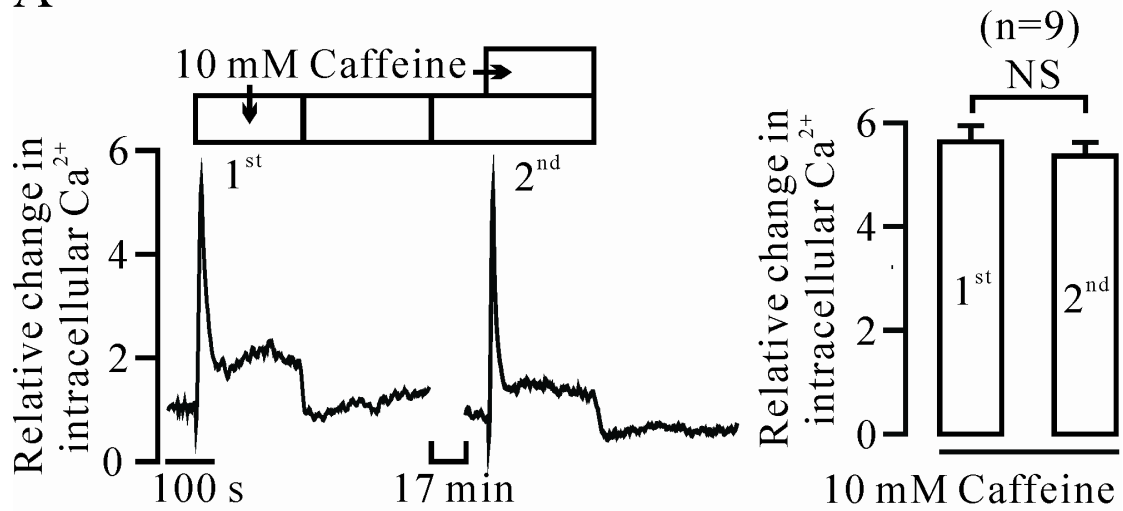

**B**

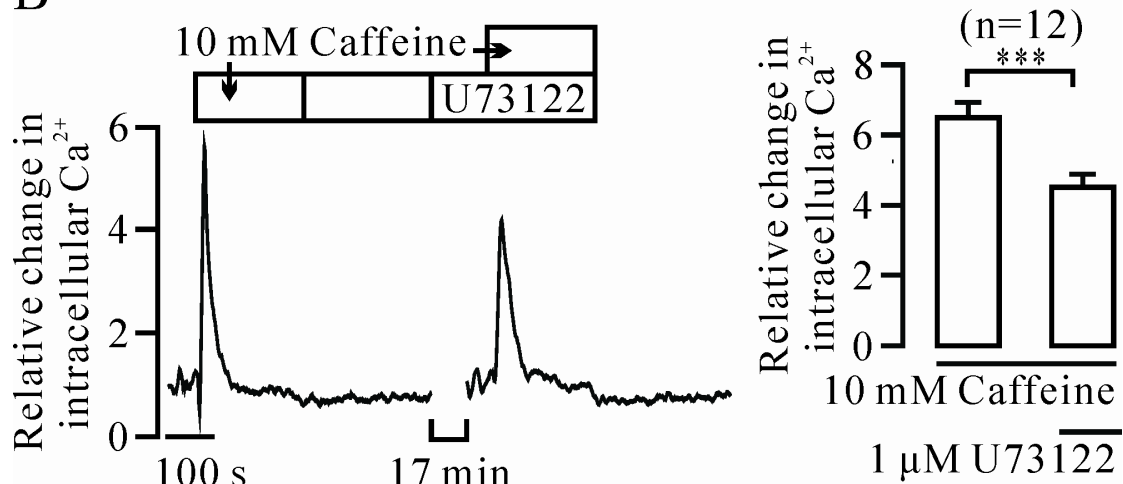

**Figure S5. U73122 inhibits caffeine-induced  $Ca^{2+}$  increases.** (A) Caffeine (10 mM)-induced  $Ca^{2+}$  increases were measured using fluo-4 AM and confocal microscope, which were inhibited by the PLC inhibitor U73122 (B) \*\*\*:  $p < 0.001$ ; NS:  $p > 0.05$ . This result suggests that PLC mediates caffeine-induced  $Ca^{2+}$  elevations.
