# Supplementary material for: Involvement of Large-Conductance Ca2+-Activated K+ Channels in Chloroquine-Induced Force Alterations in Pre-Contracted Airway Smooth Muscle
Source: PubMed Central journal article supplement (PMC4378962; doi:10.1371/journal.pone.0121566), 2015-03-30
Supplement: pone.0121566.s006.pdf [file pone.0121566.s006.pdf]

**Figure S6**

**A**

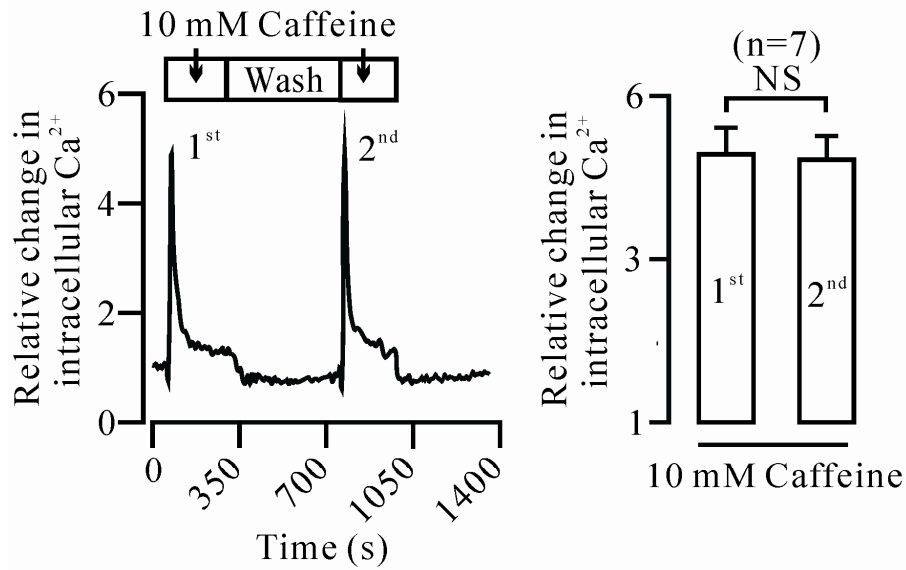

**B**

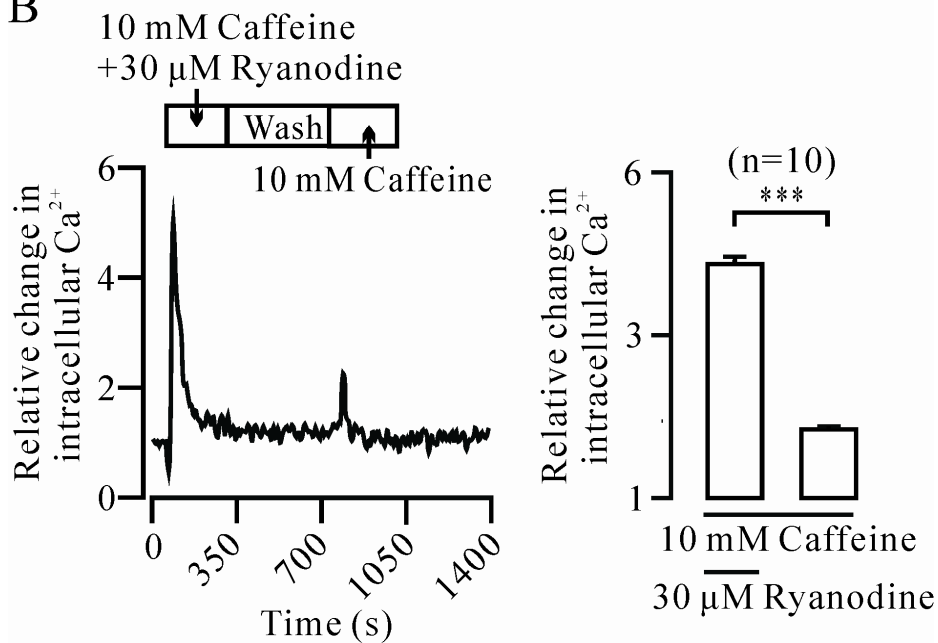

**Figure S6. Ryanodine inhibits caffeine-induced  $Ca^{2+}$  increases. (A)** Caffeine (10 mM) and ryanodine (30  $\mu$ M) were used to open and block RyRs, respectively, which induced  $Ca^{2+}$  increases measured with fluo-4 AM and confocal microscope. Following washout, caffeine-induced  $Ca^{2+}$  increases were still observed. **(B)** The summary results from 10 cells. \*\*\*:  $p < 0.001$ ; NS:  $p > 0.05$ . These data imply that caffeine can induce  $Ca^{2+}$  elevations via RyR-independent pathway.
