# Supplementary material for: Involvement of Large-Conductance Ca2+-Activated K+ Channels in Chloroquine-Induced Force Alterations in Pre-Contracted Airway Smooth Muscle
Source: PubMed Central journal article supplement (PMC4378962; doi:10.1371/journal.pone.0121566), 2015-03-30
Supplement: pone.0121566.s007.pdf [file pone.0121566.s007.pdf]

**Figure S7**

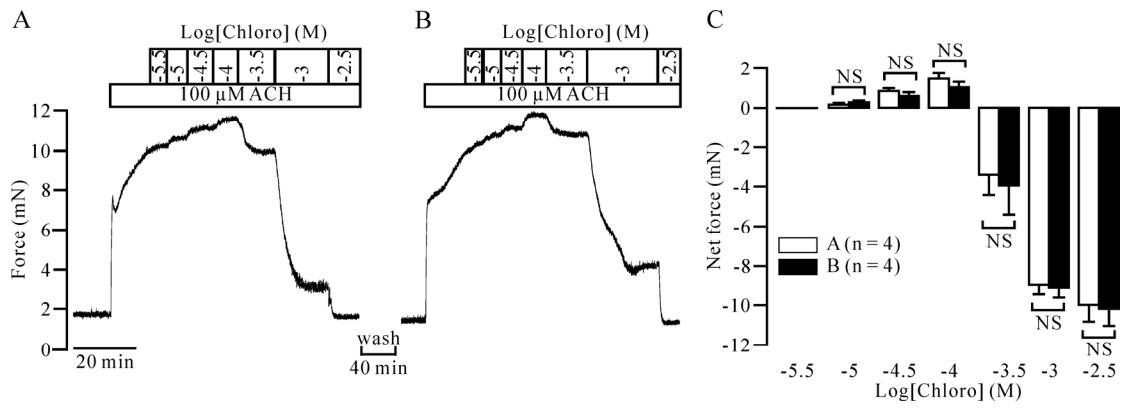

**Figure S7. Chloro-induced force changes are reproducible. (A)** A typical experiment performed as described in Figure 7A. **(B)** After washing out chloro and a 40 min rest period, an equivalent experiment was performed. **(C)** The summarized results. NS:  $p > 0.05$ . These data indicate that chloro can time-independently induce biphasic changes in force.
