# Supplementary material for: Involvement of Large-Conductance Ca2+-Activated K+ Channels in Chloroquine-Induced Force Alterations in Pre-Contracted Airway Smooth Muscle
Source: PubMed Central journal article supplement (PMC4378962; doi:10.1371/journal.pone.0121566), 2015-03-30
Supplement: pone.0121566.s008.pdf [file pone.0121566.s008.pdf]

**Figure S8.**

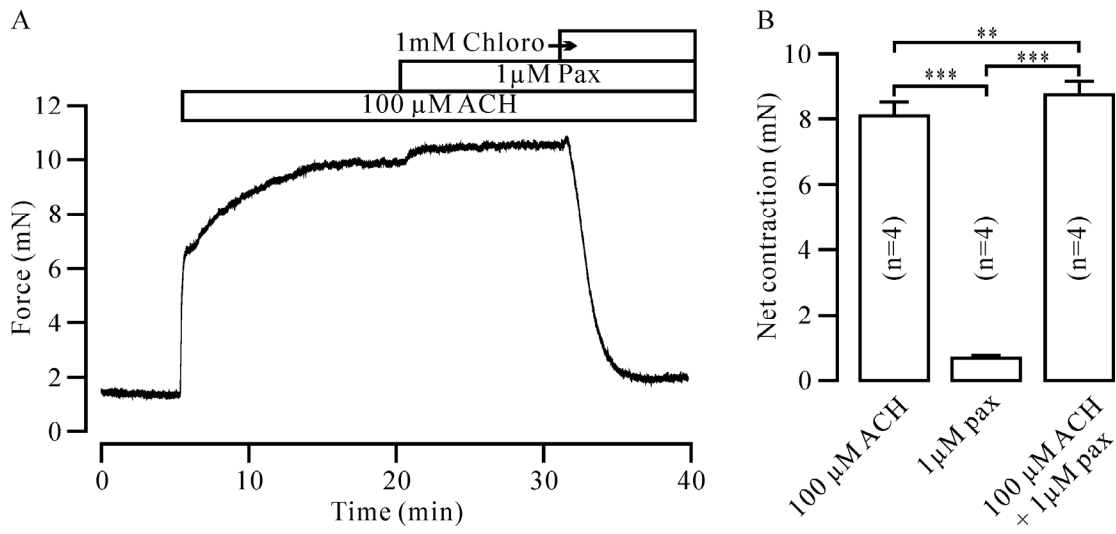

**Figure S8. Pax induces contraction.** (A) Following ACH-induced contraction reached a plateau, pax added and resulted in an additional contraction. (B) Summarized contractions from 4 rings. This result demonstrates that blockade of BKs results in contraction in ASM. \*\*:  $p < 0.01$ ; \*\*\*:  $p < 0.001$ .
